# Supplementary material for: What brain abnormalities can magnetic resonance imaging detect in foetal and early neonatal spina bifida: a systematic review
Source: PubMed Central journal article supplement (PMC8789702; doi:10.1007/s00234-021-02853-1), 2021-11-18
Supplement: 234_2021_2853_MOESM1_ESM.pdf [file 234_2021_2853_MOESM1_ESM.pdf]

| Type of Surgery                           | First Author and Year of Publication |            | Fetal Spina Bifida Patients (No.) | Fetus ≤ 26 weeks GA scans (No.) | Fetus >26 weeks GA scans (No.) | Neonatal ≤28 days scans (No.) |
|-------------------------------------------|--------------------------------------|------------|-----------------------------------|---------------------------------|--------------------------------|-------------------------------|
| Postnatal Surgery                         | Ando 2007[30]                        |            | 5                                 | -                               | 5                              | -                             |
|                                           | Araujo 2013[2]                       |            | 10                                | -                               | 10                             | -                             |
|                                           | Levine 2002[15]                      |            | 13                                | 9                               | 4                              | -                             |
|                                           | Saleem 2009[14]                      |            | 8                                 | 3                               | 5                              | -                             |
|                                           | Walker 2016[55]                      |            | 46                                | 46 (GA not stated)              |                                | 34                            |
| Fetal surgery (Open Fetal and Fetoscopic) | Vazquez 2016[56]                     | Open Fetal | 7                                 | 7                               | 7                              | 7                             |
|                                           |                                      | Fetoscopic | 7                                 | 7                               | 7                              | 7                             |
| Both Postnatal and Open Fetal surgery     | Didier 2019[31]                      | Postnatal  | 459                               | 459 (GA not stated)             |                                |                               |
|                                           |                                      | Open Fetal | 8                                 | 8 (GA not stated)               |                                | 28                            |
|                                           | Maurice 2020[32]                     | Postnatal  | 12                                | 12                              | -                              | -                             |
|                                           |                                      | Open Fetal | 13                                | 13                              | -                              | -                             |
| Total Postnatal Surgery                   |                                      |            | 553                               | 24                              | 24                             | 34                            |
| Total Open Fetal surgery                  |                                      |            | 28                                | 20                              | 7                              | 35                            |
| Total Fetoscopic surgery                  |                                      |            | 7                                 | 7                               | 7                              | 7                             |
| Total                                     |                                      |            | 588                               | 51                              | 38                             | 76                            |

Table 1: Included studies for systematic review 1 comparing MRI directly to ultrasound in detection of additional brain abnormalities, in patients with fetal spina bifida in the fetal and early neonatal period. GA: gestational age

| Type of Surgery    | First Author and Year of Publication | Fetal Spina Bifida (OSB) Patients (No.) | Closed Spina Bifida (CSB) Patients (No.) | Fetus ≤ 26 week GA scans (No.) | Fetus >26 week GA scans (No.) | Neonatal ≤28 days scans (No.) |
|--------------------|--------------------------------------|-----------------------------------------|------------------------------------------|--------------------------------|-------------------------------|-------------------------------|
| Postnatal Surgery  | Abele 2013[57]                       | 37                                      | -                                        | -                              | 37                            | -                             |
|                    | Appasamy 2006[58]                    | 8                                       | -                                        | 8 (GA not stated)              |                               |                               |
|                    | Batty 2012[35]                       | 65                                      | -                                        | 1                              | 17                            | -                             |
|                    | Chance 2015[59]                      | -                                       | 1                                        | -                              | -                             | 1 (CSB)                       |
|                    | Hashiguchi 2015[19]                  | 16                                      | -                                        | -                              | -                             | 16                            |
|                    | Hino-Shishikura 2015[37]             | 66                                      | 29                                       | -                              | -                             | 66                            |
|                    | Manganaro 2012[60]                   | 1                                       | -                                        | -                              | -                             | 1                             |
|                    | Mignone Philpott 2013[47]            | 8                                       | -                                        | 8                              | -                             | -                             |
|                    | Nagaraj 2016[52]                     | 90                                      | 16                                       | 90                             | 16 (CSB)                      | 90 (OSB), 16 (CSB)            |
|                    | Rangasami 2012[61]                   | 15                                      | -                                        | -                              | 15                            | -                             |
|                    | Rickard 2006[53]                     | 17                                      | -                                        | 17                             | -                             | -                             |
|                    | Shrot 2019[49]                       | 26                                      | -                                        | 26                             | -                             | -                             |
|                    | Sival 2011[62]                       | 40                                      | -                                        | -                              | -                             | 40                            |
|                    | Sweeny 2012[54]                      | 33                                      | -                                        | -                              | -                             | 33                            |
|                    | Vaikousi 2017[26]                    | 11                                      | -                                        | 11 (GA not stated)             |                               |                               |
|                    | Warner 2019[8]                       | 20                                      | -                                        | 20                             | 20                            | -                             |
|                    | Woitek 2014[33]                      | 44                                      | 13                                       | 44(OSB), 13 (CSB)              |                               |                               |
|                    | Woitek 2016[50]                      | 15                                      | -                                        | 15                             | -                             | -                             |
|                    | Yu 2018[27]                          | 10                                      | -                                        | 10                             | -                             | -                             |
|                    | <b>Total</b>                         | <b>381</b>                              | <b>-</b>                                 | <b>231 (OSB),13 (CSB)</b>      | <b>89 (OSB),16 (CSB)</b>      | <b>246 (OSB), 17 (CSB)</b>    |
| Open Fetal Surgery | Bekiesinska-Figatowska 2013[63]      | 18                                      | -                                        | 18                             | 18                            | -                             |
|                    | Calle 2020[3]                        | 29                                      | -                                        | 29                             | -                             | -                             |
|                    | Mangels 2000[43]                     | 33                                      | -                                        | 32                             | 1                             | 4                             |
|                    | Mehollin-Ray 2014[44]                | 12                                      | -                                        | 12                             | 12                            | -                             |
|                    | Nasiadko 2014[46]                    | 9                                       | -                                        | 9                              | 9                             | -                             |

|                                                     |                                 |                   |            |   |            |           |           |
|-----------------------------------------------------|---------------------------------|-------------------|------------|---|------------|-----------|-----------|
|                                                     | Rethmann 2017[42]               |                   | 27         | - | 27         | 27        | 27        |
|                                                     | Simon 2000[64]                  |                   | 4          | - | 4          |           |           |
|                                                     | <b>Total</b>                    |                   | <b>93</b>  | - | <b>131</b> | <b>67</b> | <b>31</b> |
| <b>Fetal surgery (Fetoscopic)</b>                   | Carrabba 2019[65]               |                   | 5          | - | -          | 3         | 5         |
| <b>Both Open Fetal and Fetoscopic Fetal Surgery</b> | Nagaraj 2020[45]                | Open Fetal        | 47         | - | 47         | 5         | 47        |
|                                                     |                                 | Fetoscopic        | 15         | - | 15         | 6         | 15        |
|                                                     | Sanz-Cortes 2018[28]            | Open Fetal        | 10         | - | 10         | 10        | -         |
|                                                     |                                 | Fetoscopic        | 10         | - | 10         | 10        | -         |
|                                                     | Sanz-Cortes 2020[48]            | Open Fetal        | 30         | - | 16         | 24        | -         |
|                                                     |                                 | Fetoscopic        | 27         | - | 14         | 24        | -         |
|                                                     | Zarutskie 2019[51]              | Open Fetal        | 30         | - | 30         | 30        | -         |
|                                                     |                                 | Fetoscopic        | 18         | - | 18         | 18        | -         |
|                                                     | <b>Total Open Fetal</b>         | <b>Open Fetal</b> | <b>117</b> | - | <b>103</b> | <b>69</b> | <b>47</b> |
|                                                     | <b>Total Fetoscopic</b>         | <b>Fetoscopic</b> | <b>70</b>  | - | <b>57</b>  | <b>58</b> | <b>15</b> |
| <b>Both Postnatal and Open Fetal Surgery</b>        | Aertsen 2019[6]                 | Postnatal         | 29         | - | 29         |           | -         |
|                                                     |                                 | Open Fetal        | 23         | - | 23         | 23        | -         |
|                                                     | Danzer 2007[40]                 | Postnatal         | 16         | - | -          | 16        | -         |
|                                                     |                                 | Open Fetal        | 22         | - | 22         | 22        | -         |
|                                                     | Grant 2011[36]                  | Postnatal         | 24         | - | -          | -         | 24        |
|                                                     |                                 | Open Fetal        | 29         | - | 29         | 29        | -         |
|                                                     | Nagaraj 2017[39]                | Postnatal         | 70         | - | 70         | -         | 70        |
|                                                     |                                 | Open Fetal        | 32         | - | 32         | -         | 32        |
|                                                     | Nagaraj 2016[66]                | Postnatal         | 74         | - | 74         | -         | -         |
|                                                     |                                 | Open Fetal        | 21         | - | 21         | -         | -         |
|                                                     | <b>Total Postnatal Surgery</b>  | <b>Postnatal</b>  | <b>213</b> | - | <b>173</b> | <b>16</b> | <b>94</b> |
|                                                     | <b>Total Open Fetal Surgery</b> | <b>Open Fetal</b> | <b>127</b> | - | <b>127</b> | <b>74</b> | <b>32</b> |

| <b>Fetal Spina Bifida</b>             |             |   | <b>Fetus ≤ 26 weeks GA scans (No)</b> | <b>Fetus &gt;26 weeks GA scans (No)</b> | <b>Neonatal ≤28 days scans (No)</b> |
|---------------------------------------|-------------|---|---------------------------------------|-----------------------------------------|-------------------------------------|
| <b>Total Postnatal Surgery</b>        | 594         | - | 282                                   | 118                                     | 340                                 |
| <b>Total Open Fetal Surgery</b>       | 337         | - | 371                                   | 220                                     | 110                                 |
| <b>Total Fetoscopic Fetal Surgery</b> | 75          | - | 57                                    | 61                                      | 20                                  |
| <b>Total</b>                          | <b>1006</b> | - | <b>710</b>                            | <b>399</b>                              | <b>470</b>                          |
| <b>Closed Spina Bifida</b>            |             | - | -                                     | -                                       | -                                   |
| <b>Total</b>                          | <b>46</b>   | - | <b>13</b>                             | <b>16</b>                               | <b>17</b>                           |

Table 2: Included studies for systematic review 2 on detection of brain abnormalities by MRI in fetal and early neonatal spina bifida. OSB = fetal spina bifida, CSB = closed spina bifida, GA=gestational age

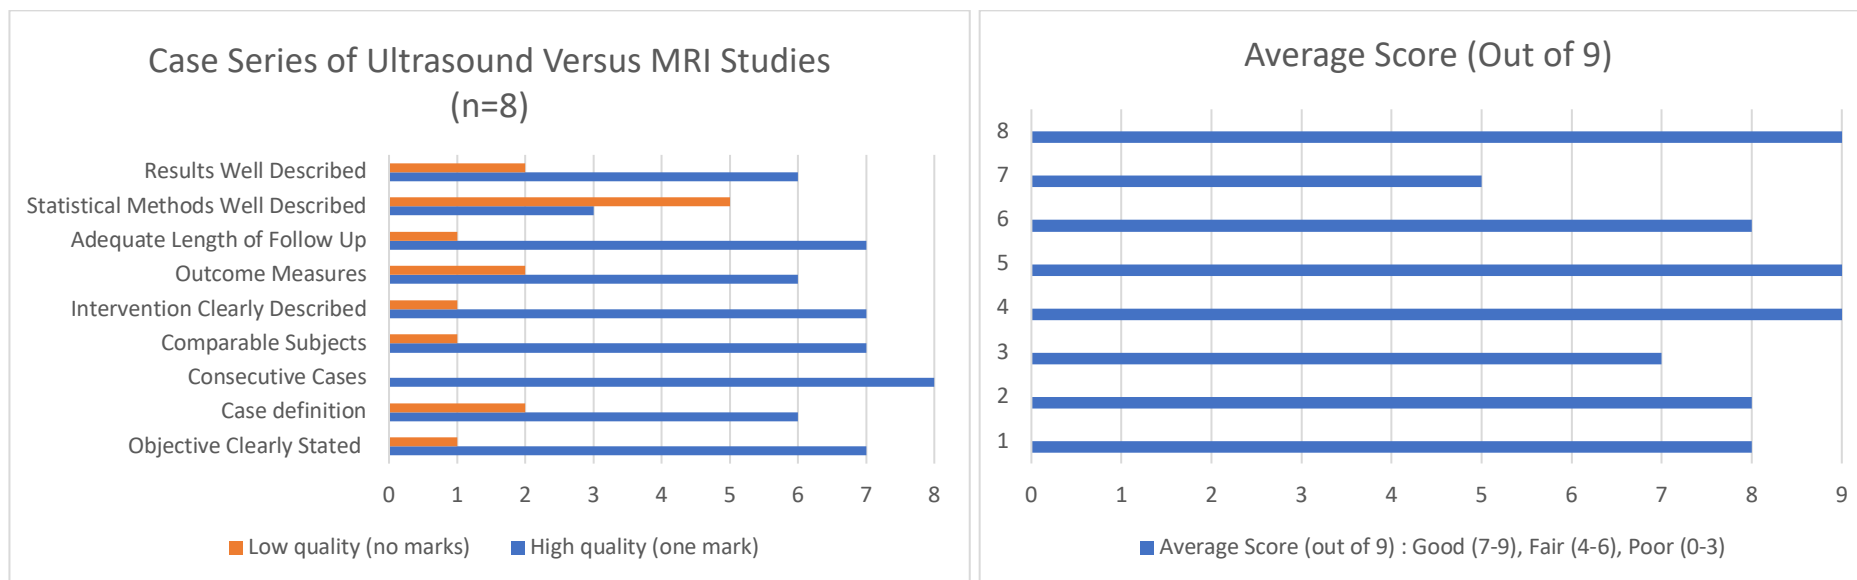

**Fig. 1** Summary of risk of bias for according to study type (case-series) in the systematic review comparing MRI to ultrasound in detection of additional brain abnormalities, in fetal and early neonatal spina bifida (SR1)

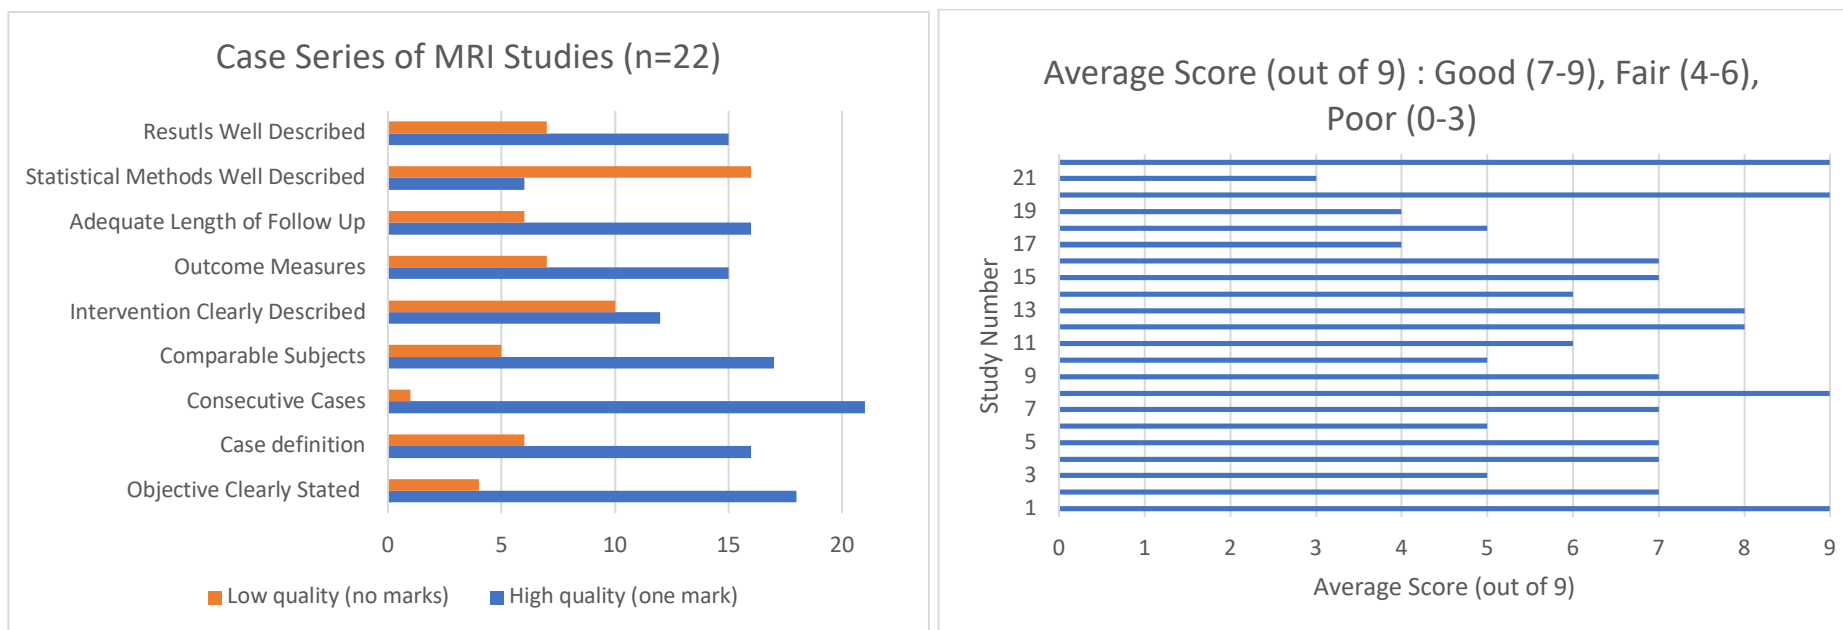

**Fig. 2** Summary of risk of bias for according to study type (case-series) in the systematic review on detection of brain abnormalities by MRI in fetal and early neonatal spina bifida (SR2)

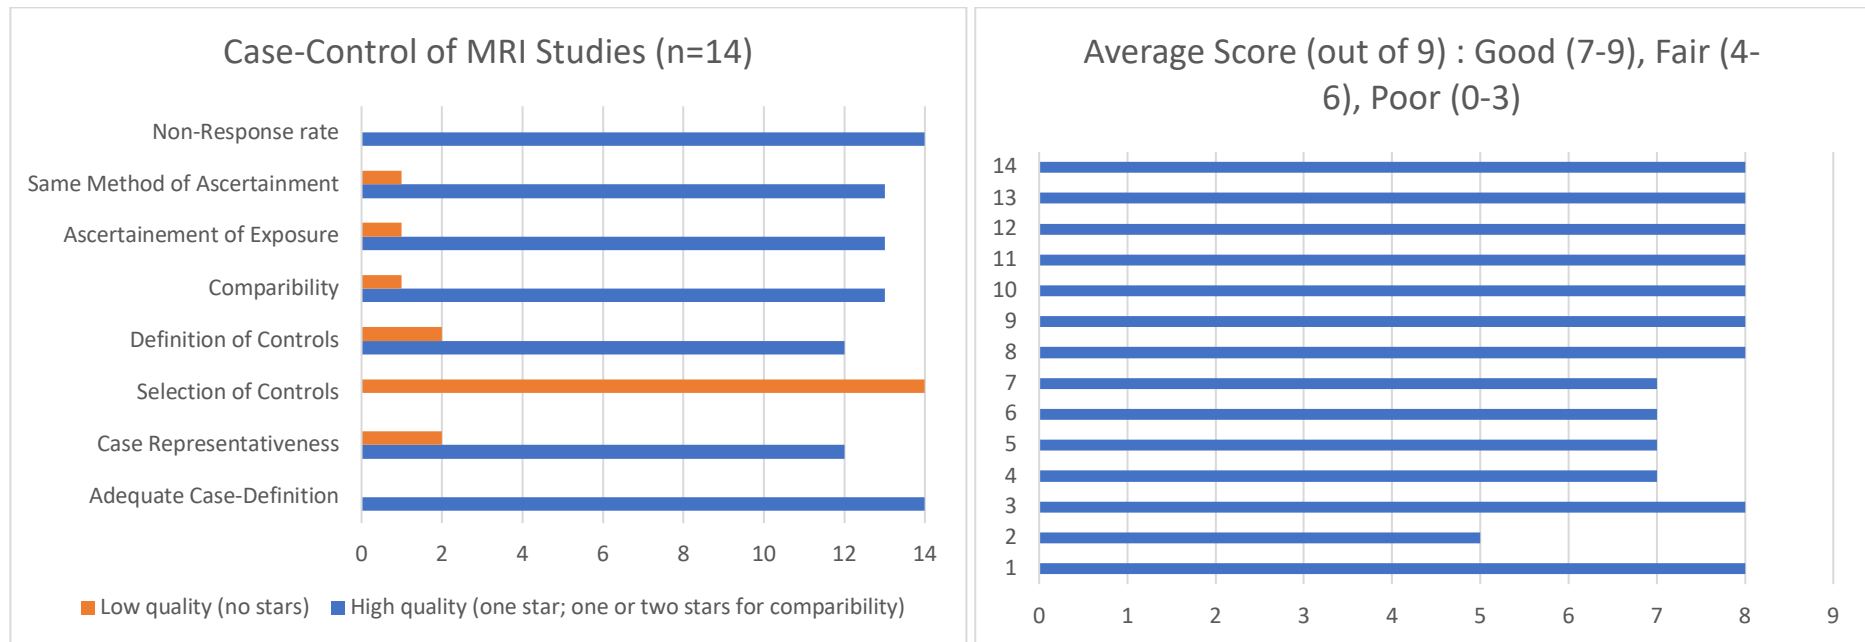

**Fig. 3** Summary of risk of bias for according to study type (non-randomised study) in the systematic review on detection of brain abnormalities by MRI in fetal and early neonatal spina bifida (SR2)

| Abnormality                                                                                                           | Timepoint                                                            | Number of Studies | Event Rate | Lower Limit | Upper Limit | Heterogeneity |         |
|-----------------------------------------------------------------------------------------------------------------------|----------------------------------------------------------------------|-------------------|------------|-------------|-------------|---------------|---------|
|                                                                                                                       |                                                                      |                   |            |             |             | I-squared     | P-Value |
| Callosal (Agenesis: complete/partial), Heterotopia, Hindbrain herniation, Ventriculomegaly/Hydrocephalus              | Fetus $\leq$ 26 weeks GA                                             | 22                | 87.5       | 72.5        | 94.9        | 78.875        | 0.000   |
| Heterotopia, Hindbrain herniation, Ventriculomegaly/Hydrocephalus                                                     | Fetus > 26 weeks GA                                                  | 9                 | 82.2       | 54.5        | 94.7        | 81.908        | 0.000   |
| Callosal (Agenesis: complete/partial), Heterotopia, Hindbrain herniation, Ventriculomegaly/Hydrocephalus              | Neonatal $\leq$ 28 days                                              | 13                | 75.9       | 52.9        | 89.8        | 89.654        | 0.000   |
| Callosal (Agenesis: complete/partial), Cerebellar Abnormalities, Hindbrain herniation, Ventriculomegaly/Hydrocephalus | All gestations                                                       | 22                | 89.0       | 81.8        | 93.6        | 71.441        | 0.000   |
| Callosal (Agenesis: complete/partial)                                                                                 | Fetus $\leq$ 26 weeks GA, Neonatal $\leq$ 28 days, All gestations    | 4                 | 15.1       | 5.7         | 34.3        | 0.000         | 0.779   |
|                                                                                                                       | Fetus $\leq$ 26 weeks GA                                             | 2                 | 15.5       | 3.8         | 45.7        | 0.000         | 0.482   |
|                                                                                                                       | Neonatal $\leq$ 28 days                                              | 1                 | 25.0       | 3.4         | 76.2        | 0.000         | 1.000   |
|                                                                                                                       | All gestations                                                       | 1                 | 9.1        | 1.3         | 43.9        | 0.000         | 1.000   |
| Cerebellar Abnormalities                                                                                              | All gestations                                                       | 4                 | 88.9       | 22.0        | 99.6        | 85.031        | 0.000   |
| Heterotopia                                                                                                           | Fetus $\leq$ 26 weeks GA, Fetus>26 weeks GA, Neonatal $\leq$ 28 days | 10                | 25.5       | 17.4        | 35.9        | 63.686        | 0.003   |
|                                                                                                                       | Fetus $\leq$ 26 weeks GA                                             | 3                 | 19.8       | 7.7         | 42.2        | 27.446        | 0.252   |
|                                                                                                                       | Fetus>26 weeks GA                                                    | 2                 | 25.3       | 13.7        | 41.9        | 0.000         | 0.508   |
|                                                                                                                       | Neonatal $\leq$ 28 days                                              | 5                 | 26.9       | 15.3        | 42.8        | 80.157        | 0.000   |
| Hindbrain herniation                                                                                                  | All gestations                                                       | 9                 | 92.2       | 84.4        | 96.3        | 62.943        | 0.006   |
|                                                                                                                       | Fetus $\leq$ 26 weeks GA                                             | 7                 | 97.4       | 92.8        | 99.1        | 0.000         | 0.941   |
|                                                                                                                       | Fetus>26 weeks GA                                                    | 4                 | 90.6       | 43.7        | 99.2        | 79.945        | 0.002   |
|                                                                                                                       | Neonatal $\leq$ 28 days                                              | 3                 | 98.9       | 94.7        | 99.8        | 0.000         | 0.940   |
| Ventriculomegaly/Hydrocephalus                                                                                        | All gestations                                                       | 8                 | 87.6       | 77.6        | 93.5        | 50.525        | 0.049   |
|                                                                                                                       | Fetus $\leq$ 26 weeks GA                                             | 10                | 93.2       | 82.5        | 97.5        | 59.447        | 0.008   |
|                                                                                                                       | Fetus>26 weeks GA                                                    | 3                 | 92.5       | 78.8        | 97.6        | 0.000         | 0.378   |
|                                                                                                                       | Neonatal $\leq$ 28 days                                              | 4                 | 96.6       | 90.6        | 98.8        | 0.000         | 0.853   |



Table 3: Heterogeneity for all MRI Studies

| Abnormality                                 | Timepoint                                              | Number of Studies | Event Rate | Lower Limit | Upper Limit | Heterogeneity |         |
|---------------------------------------------|--------------------------------------------------------|-------------------|------------|-------------|-------------|---------------|---------|
|                                             |                                                        |                   |            |             |             | I-squared     | P-Value |
| Chiari II reversal (Complete/Partial)       | Fetus > 26 weeks GA, Neonatal ≤28 days, All gestations | 10                | 85.9       | 66.3        | 94.9        | 87.400        | 0.000   |
|                                             | Fetus > 26 weeks GA                                    | 4                 | 87.7       | 69.9        | 95.7        | 27.327        | 0.248   |
|                                             | Neonatal ≤28 days                                      | 4                 | 92.3       | 60.7        | 99.0        | 72.755        | 0.012   |
|                                             | All gestations                                         | 3                 | 76.2       | 22.7        | 97.2        | 93.912        | 0.000   |
| Stable Ventriculomegaly Post Operatively    | Fetus ≤26 weeks GA                                     | 1                 | 11.1       | 1.5         | 50.0        | 0.000         | 1.000   |
| Reduced Ventriculomegaly Post Operatively   | Fetus > 26 weeks GA                                    | 2                 | 6.3        | 1.6         | 22.2        | 0.000         | 0.423   |
| Increased Ventriculomegaly Post Operatively | Fetus >26 weeks GA, Neonatal ≤28 days                  | 6                 | 71.7       | 44.6        | 88.8        | 76.171        | 0.001   |
|                                             | Fetus >26 weeks GA                                     | 5                 | 76.8       | 63.1        | 86.4        | 0.000         | 0.448   |
|                                             | Neonatal ≤28 days                                      | 2                 | 43.4       | 23.8        | 65.3        | 70.968        | 0.063   |

Table 4: Heterogeneity for Post-Operative Findings

| Characteristics     |                                                         |                                             | Statistics for each study |                |                 |                 |
|---------------------|---------------------------------------------------------|---------------------------------------------|---------------------------|----------------|-----------------|-----------------|
| Time Point          | Abnormality                                             | Study Name (Author, year, Type of Surgery)  | Event/Total               | Event rate (%) | Lower Limit (%) | Upper Limit (%) |
| Fetus ≤ 26 Weeks GA | Callosal Abnormalities (Agenesis - Complete or Partial) | Yu 2018 (Postnatal Surgery)[27]             | 1 / 10                    | 10.0           | 1.4             | 46.7            |
|                     |                                                         | Simon 2000 (Open Fetal Surgery)[16]         | 1 / 4                     | 25.0           | 3.4             | 76.2            |
|                     | Heterotopia                                             | Nasiadko 2014 (Open Fetal Surgery)[25]      | 1 / 9                     | 11.1           | 1.5             | 50.0            |
|                     |                                                         | Rethmann 2017 (Open Fetal Surgery)[42]      | 4 / 27                    | 14.8           | 5.7             | 33.5            |
|                     |                                                         | Simon 2000 (Open Fetal Surgery)[16]         | 2 / 4                     | 50.0           | 12.3            | 87.7            |
|                     | Hindbrain Herniation                                    | Yu 2018 (Postnatal Surgery)[27]             | 10 / 10                   | 95.5           | 55.2            | 99.7            |
|                     |                                                         | Calle 2020 (Open Fetal Surgery)[3]          | 29 / 29                   | 98.3           | 78.3            | 99.9            |
|                     |                                                         | Simon 2000 (Open Fetal Surgery)[16]         | 4 / 4                     | 90.0           | 32.6            | 99.4            |
|                     |                                                         | Nagaraj 2020 (Open Fetal Surgery)[45]       | 47 / 47                   | 99.0           | 85.4            | 99.9            |
|                     |                                                         | Nagaraj 2020 (Fetoscopic Fetal Surgery)[45] | 15 / 15                   | 96.9           | 65.0            | 99.8            |

|                                    |                                                         |                                                             |                                  |                       |                        |                        |
|------------------------------------|---------------------------------------------------------|-------------------------------------------------------------|----------------------------------|-----------------------|------------------------|------------------------|
|                                    |                                                         | Aertsen 2019 (Open Fetal Surgery)[6]                        | 23 / 23                          | 97.9                  | 74.1                   | 99.9                   |
|                                    |                                                         | Aertsen 2019 (Postnatal Surgery)[6]                         | 29 / 29                          | 98.3                  | 78.3                   | 99.9                   |
|                                    | Ventriculomegaly/Hydrocephalus                          | Batty 2012 (Postnatal Surgery)[35]                          | 48 / 48                          | 99.0                  | 85.7                   | 99.9                   |
|                                    |                                                         | Rickard 2006 (Postnatal Surgery)[53]                        | 14 / 17                          | 82.4                  | 57.3                   | 94.2                   |
|                                    |                                                         | Shrot 2006 (Postnatal Surgery)[49]                          | 16 / 26                          | 61.5                  | 42.1                   | 77.9                   |
|                                    |                                                         | Yu 2018 (Postnatal Surgery)[27]                             | 10 / 10                          | 95.5                  | 55.2                   | 99.7                   |
|                                    |                                                         | Nasiadko 2014 (Open Fetal Surgery)[25]                      | 9 / 9                            | 95.0                  | 52.5                   | 99.7                   |
|                                    |                                                         | Rethmann 2017 (Open Fetal Surgery)[42]                      | 27 / 27                          | 98.2                  | 77.0                   | 99.9                   |
|                                    |                                                         | Sanz-Cortes 2018 (Open Fetal Surgery)[28]                   | 10 / 10                          | 95.5                  | 55.2                   | 99.7                   |
|                                    |                                                         | Sanz-Cortes 2018 (Fetoscopic Fetal Surgery)[28]             | 10 / 10                          | 95.5                  | 55.2                   | 99.7                   |
|                                    |                                                         | Sanz-Cortes 2020 (Open Fetal Surgery)[48]                   | 16 / 16                          | 97.1                  | 66.4                   | 99.8                   |
|                                    |                                                         | Sanz-Cortes 2020 (Fetoscopic Fetal Surgery)[48]             | 14 / 14                          | 96.7                  | 63.4                   | 99.8                   |
| <b>Cumulative Study Statistics</b> |                                                         |                                                             | <b>327/398</b>                   | <b>87.5</b>           | <b>72.5</b>            | <b>94.9</b>            |
| <b>Characteristics</b>             |                                                         |                                                             | <b>Statistics for each study</b> |                       |                        |                        |
| <b>Time Point</b>                  | <b>Abnormality</b>                                      | <b>Study Name (Author, year, Type of Surgery)</b>           | <b>Event/Total</b>               | <b>Event rate (%)</b> | <b>Lower Limit (%)</b> | <b>Upper Limit (%)</b> |
| Fetus > 26 Weeks GA                | Heterotopia                                             | Nasiadko 2014 (Open Fetal Surgery)[25]                      | 3 / 9                            | 33.3                  | 11.1                   | 66.7                   |
|                                    |                                                         | Rethmann 2017 (Open Fetal Surgery)[42]                      | 6 / 27                           | 22.2                  | 10.3                   | 41.4                   |
|                                    | Hindbrain Herniation                                    | Abele 2013 (Postnatal Surgery)[57]                          | 37 / 37                          | 98.7                  | 82.2                   | 99.9                   |
|                                    |                                                         | Carrabba 2019 (Fetoscopic Fetal Surgery)[65]                | 5 / 5                            | 91.7                  | 37.8                   | 99.5                   |
|                                    |                                                         | Hashiguchi 2015 (Postnatal Surgery)[65]                     | 7 / 16                           | 43.8                  | 22.5                   | 67.6                   |
|                                    |                                                         | Rangasami 2012 (Postnatal Surgery)[61]                      | 15 / 15                          | 96.9                  | 65.0                   | 99.8                   |
|                                    | Ventriculomegaly/Hydrocephalus                          | Warner 2019 (Postnatal Surgery)[8]                          | 20 / 20                          | 97.6                  | 71.3                   | 99.9                   |
|                                    |                                                         | Batty 2012 (Postnatal Surgery)[35]                          | 17 / 17                          | 97.2                  | 67.8                   | 99.8                   |
|                                    |                                                         | Rangasami 2012 (Postnatal Surgery)[61]                      | 13 / 15                          | 86.7                  | 59.5                   | 96.6                   |
| <b>Cumulative Study Statistics</b> |                                                         |                                                             | <b>123/161</b>                   | <b>82.2</b>           | <b>54.5</b>            | <b>94.7</b>            |
| <b>Characteristics</b>             |                                                         |                                                             | <b>Statistics for each study</b> |                       |                        |                        |
| <b>Time Point</b>                  | <b>Abnormality</b>                                      | <b>Study Name (Author, year, Type of Surgery)</b>           | <b>Event/Total</b>               | <b>Event rate (%)</b> | <b>Lower Limit (%)</b> | <b>Upper Limit (%)</b> |
| Neonatal ≤28 days                  | Callosal Abnormalities (Agenesis - Complete or Partial) | Mangels 2000 (Open Fetal Surgery)[17]                       | 1 / 4                            | 25.0                  | 3.4                    | 76.2                   |
|                                    |                                                         | Rethmann 2017 (Open Fetal Surgery)[42]                      | 12 / 27                          | 44.4                  | 27.2                   | 63.1                   |
|                                    | Heterotopia                                             | Nagaraj 2020 (Open Fetal Surgery)[45]                       | 19 / 47                          | 40.4                  | 27.5                   | 54.9                   |
|                                    |                                                         | Nagaraj 2020 (Fetoscopic Fetal Surgery)[45]                 | 2 / 15                           | 13.3                  | 3.4                    | 40.5                   |
|                                    |                                                         | Nagaraj 2016 (Open Fetal Surgery and Postnatal Surgery)[66] | 11 / 95                          | 11.6                  | 6.5                    | 19.7                   |
|                                    |                                                         | Hino-Shishijura 2015 (Postnatal Surgery)[37]                | 20 / 66                          | 30.3                  | 20.5                   | 42.4                   |

|                                       |                                                             |                                                             |                                       |                       |                        |                        |
|---------------------------------------|-------------------------------------------------------------|-------------------------------------------------------------|---------------------------------------|-----------------------|------------------------|------------------------|
|                                       | Hindbrain Herniation                                        | Sival 2011 (Postnatal Surgery)[62]                          | 40 / 40                               | 98.8                  | 83.3                   | 99.9                   |
|                                       |                                                             | Hino-Shishijura 2015 (Postnatal Surgery)[37]                | 66 / 66                               | 99.3                  | 89.2                   | 100.0                  |
|                                       |                                                             | Sweeny 2012 (Postnatal Surgery)[54]                         | 33 / 33                               | 98.5                  | 80.4                   | 99.9                   |
|                                       | Ventriculomegaly/Hydrocephalus                              | Danzer 2007 (Open Fetal Surgery)[40]                        | 22 / 22                               | 97.8                  | 73.2                   | 99.9                   |
|                                       |                                                             | Danzer 2007 (Postnatal Surgery)[40]                         | 16 / 16                               | 97.1                  | 66.4                   | 99.8                   |
|                                       |                                                             | Sival 2011 (Postnatal Surgery)[62]                          | 38 / 40                               | 95.0                  | 82.1                   | 98.7                   |
|                                       |                                                             | Sweeny 2012 (Postnatal Surgery)[54]                         | 33 / 33                               | 98.5                  | 80.4                   | 99.9                   |
| <b>Cumulative Study Statistics</b>    |                                                             |                                                             | <b>313/504</b>                        | <b>75.9</b>           | <b>52.9</b>            | <b>89.8</b>            |
| <b>Characteristics</b>                |                                                             |                                                             | <b>Statistics for each study</b>      |                       |                        |                        |
| <b>Time Point</b>                     | <b>Abnormality</b>                                          | <b>Study Name (Author, year, Type of Surgery)</b>           | <b>Event/Total</b>                    | <b>Event rate (%)</b> | <b>Lower Limit (%)</b> | <b>Upper Limit (%)</b> |
| All gestations                        | Cerebellar Abnormalities                                    | Vaikousi 2017 (Postnatal Surgery)[26]                       | 1 / 11                                | 9.1                   | 1.3                    | 43.9                   |
|                                       |                                                             | Danzer 2007 (Open Fetal Surgery)[40]                        | 22 / 22                               | 97.8                  | 73.2                   | 99.9                   |
|                                       |                                                             | Danzer 2007 (Postnatal Surgery)[40]                         | 16 / 16                               | 97.1                  | 66.4                   | 99.8                   |
|                                       |                                                             | Vaikousi 2017 (Postnatal Surgery)[26]                       | 1 / 11                                | 9.1                   | 1.3                    | 43.9                   |
|                                       |                                                             | Warner 2019 (Postnatal Surgery)[8]                          | 20 / 20                               | 97.6                  | 71.3                   | 99.9                   |
|                                       | Hindbrain Herniation                                        | Batty 2012 (Postnatal Surgery)[35]                          | 50 / 65                               | 6.9                   | 65.2                   | 85.6                   |
|                                       |                                                             | Mangels 2000 (Open Fetal Surgery)[17]                       | 37 / 37                               | 98.7                  | 82.2                   | 99.9                   |
|                                       |                                                             | Grant 2011 (Open Fetal Surgery)[36]                         | 29 / 29                               | 98.3                  | 78.3                   | 99.9                   |
|                                       |                                                             | Nagaraj 2016 (Open Fetal Surgery and Postnatal Surgery)[66] | 87 / 95                               | 91.6                  | 84.1                   | 95.7                   |
|                                       |                                                             | Nagaraj 2016 (Postnatal Surgery)[52]                        | 86 / 90                               | 95.6                  | 88.8                   | 98.3                   |
|                                       |                                                             | Mehollin-Ray 2014 (Open Fetal Surgery)[44]                  | 11 / 12                               | 91.7                  | 58.7                   | 98.8                   |
|                                       |                                                             | Warner 2019 (Postnatal Surgery)[8]                          | 20 / 20                               | 97.6                  | 71.3                   | 99.9                   |
|                                       |                                                             | Bekiesinska-Figatowska 2013 (Open Fetal Surgery)[63]        | 18 / 18                               | 97.4                  | 69.0                   | 99.8                   |
|                                       |                                                             | Appasamy 2006 (Postnatal Surgery)[58]                       | 6 / 8                                 | 75.0                  | 37.7                   | 93.7                   |
|                                       |                                                             | Ventriculomegaly/Hydrocephalus                              | Mangels 2000 (Open Fetal Surgery)[17] | 37 / 37               | 98.7                   | 82.2                   |
|                                       | Grant 2011 (Postnatal Surgery)[36]                          |                                                             | 24 / 24                               | 98.0                  | 74.9                   | 99.9                   |
|                                       | Nagaraj 2016 (Open Fetal Surgery and Postnatal Surgery)[66] |                                                             | 75 / 95                               | 78.9                  | 69.6                   | 86.0                   |
|                                       | Hashiguchi 2015 (Postnatal Surgery)[19]                     |                                                             | 16 / 16                               | 97.1                  | 66.4                   | 99.8                   |
|                                       | Nagaraj 2016 (Postnatal Surgery)[52]                        |                                                             | 77 / 90                               | 85.6                  | 76.7                   | 91.4                   |
|                                       | Mehollin-Ray 2014 (Open Fetal Surgery)[44]                  |                                                             | 12 / 12                               | 96.2                  | 59.7                   | 99.8                   |
| Vaikousi 2017 (Postnatal Surgery)[26] | 11 / 11                                                     |                                                             | 95.8                                  | 57.5                  | 99.7                   |                        |
| Appasamy 2006 (Postnatal Surgery)[58] | 5 / 8                                                       |                                                             | 62.5                                  | 28.5                  | 87.5                   |                        |
| <b>Cumulative Study Statistics</b>    |                                                             |                                                             | <b>661/747</b>                        | <b>89.0</b>           | <b>81.8</b>            | <b>93.6</b>            |

| Characteristics                                     |                                                         |                                            | Statistics for each study |                |                 |                 |
|-----------------------------------------------------|---------------------------------------------------------|--------------------------------------------|---------------------------|----------------|-----------------|-----------------|
| Time Point                                          | Abnormality                                             | Study Name (Author, year, Type of Surgery) | Event/Total               | Event rate (%) | Lower Limit (%) | Upper Limit (%) |
| Fetus ≤26 weeks, Neonatal ≤ 28 days, All gestations | Callosal Abnormalities (Agenesis - Complete or Partial) | Vaikousi 2017 (Postnatal Surgery)[26]      | 1 / 11                    | 9.1            | 1.3             | 43.9            |
|                                                     |                                                         | Yu 2018 (Postnatal Surgery)[27]            | 1 / 10                    | 10.0           | 1.4             | 46.7            |
|                                                     |                                                         | Simon 2000 (Open Fetal Surgery)[16]        | 1 / 4                     | 25.0           | 3.4             | 76.2            |
|                                                     |                                                         | Mangels 2000 (Open Fetal Surgery)[17]      | 1 / 4                     | 25.0           | 3.4             | 76.2            |
| <b>Cumulative Study Statistics</b>                  |                                                         |                                            | <b>4/29</b>               | <b>15.1</b>    | <b>5.7</b>      | <b>34.3</b>     |
| Characteristics                                     |                                                         |                                            | Statistics for each study |                |                 |                 |
| Time Point                                          | Abnormality                                             | Study Name (Author, year, Type of Surgery) | Event/Total               | Event rate (%) | Lower Limit (%) | Upper Limit (%) |
| Fetus ≤26 weeks GA                                  | Callosal Abnormalities (Agenesis - Complete or Partial) | Simon 2000 (Open Fetal Surgery)[16]        | 1 / 4                     | 25.0           | 3.4             | 76.2            |
|                                                     |                                                         | Yu 2018 (Postnatal Surgery)[27]            | 1 / 10                    | 10.0           | 1.4             | 46.7            |
| <b>Cumulative Study Statistics</b>                  |                                                         |                                            | <b>2/14</b>               | <b>15.5</b>    | <b>3.8</b>      | <b>45.7</b>     |
| Characteristics                                     |                                                         |                                            | Statistics for each study |                |                 |                 |
| Time Point                                          | Abnormality                                             | Study Name (Author, year, Type of Surgery) | Event/Total               | Event rate (%) | Lower Limit (%) | Upper Limit (%) |
| Neonatal ≤28 days                                   | Callosal Abnormalities (Agenesis - Complete or Partial) | Mangels 2000 (Open Fetal Surgery)[17]      | 1/4                       | 25.0           | 3.4             | 76.2            |
| <b>Cumulative Study Statistics †a</b>               |                                                         |                                            | <b>1/4</b>                | <b>25.0</b>    | <b>3.4</b>      | <b>76.2</b>     |
| Characteristics                                     |                                                         |                                            | Statistics for each study |                |                 |                 |
| Time Point                                          | Abnormality                                             | Study Name (Author, year, Type of Surgery) | Event/Total               | Event rate (%) | Lower Limit (%) | Upper Limit (%) |
| All gestations                                      | Callosal Abnormalities (Agenesis - Complete or Partial) | Vaikousi 2017 (Postnatal Surgery)[26]      | 1/11                      | 9.1            | 1.3             | 43.9            |
| <b>Cumulative Study Statistics †a</b>               |                                                         |                                            | <b>1/11</b>               | <b>9.1</b>     | <b>1.3</b>      | <b>43.9</b>     |
| Characteristics                                     |                                                         |                                            | Statistics for each study |                |                 |                 |
| Time Point                                          | Abnormality                                             | Study Name (Author, year, Type of Surgery) | Event/Total               | Event rate (%) | Lower Limit (%) | Upper Limit (%) |
| All gestations                                      | Cerebellar Abnormalities                                | Danzer 2007 (Open Fetal Surgery)[40]       | 22 / 22                   | 97.8           | 73.2            | 99.9            |
|                                                     |                                                         | Danzer 2007 (Postnatal Surgery)[40]        | 16 / 16                   | 97.1           | 66.4            | 99.8            |
|                                                     |                                                         | Vaikousi 2017 (Postnatal Surgery)[26]      | 1 / 11                    | 9.1            | 1.3             | 43.9            |
|                                                     |                                                         | Warner 2019 (Postnatal Surgery)[8]         | 20 / 20                   | 97.6           | 71.3            | 99.9            |
| <b>Cumulative Study Statistics</b>                  |                                                         |                                            | <b>59/69</b>              | <b>88.9</b>    | <b>22.0</b>     | <b>99.6</b>     |

| Characteristics                                                 |             |                                                             | Statistics for each study |                |                 |                 |
|-----------------------------------------------------------------|-------------|-------------------------------------------------------------|---------------------------|----------------|-----------------|-----------------|
| Time Point                                                      | Abnormality | Study Name (Author, year, Type of Surgery)                  | Event/Total               | Event rate (%) | Lower Limit (%) | Upper Limit (%) |
| Fetus ≤26 weeks GA,<br>Fetus>26 weeks GA,<br>Neonatal ≤ 28 days | Heterotopia | Nasiadko 2014 (Open Fetal Surgery)[25]                      | 1 / 9                     | 11.1           | 1.5             | 50.0            |
|                                                                 |             | Rethmann 2017 (Open Fetal Surgery)[42]                      | 4 / 27                    | 14.8           | 5.7             | 33.5            |
|                                                                 |             | Simon 2000 (Open Fetal Surgery)[16]                         | 2 / 4                     | 50.0           | 12.3            | 87.7            |
|                                                                 |             | Nasiadko 2014 (Open Fetal Surgery)[25]                      | 3 / 9                     | 33.3           | 11.1            | 66.7            |
|                                                                 |             | Rethmann 2017 (Open Fetal Surgery)[42]                      | 6 / 27                    | 22.2           | 10.3            | 41.4            |
|                                                                 |             | Hino-Shishijura 2015 (Postnatal Surgery)[37]                | 20 / 66                   | 30.3           | 20.5            | 42.4            |
|                                                                 |             | Nagaraj 2016 (Open Fetal Surgery and Postnatal Surgery)[66] | 11 / 95                   | 11.6           | 6.5             | 19.7            |
|                                                                 |             | Nagaraj 2020 (Fetoscopic Fetal Surgery)[45]                 | 2 / 15                    | 13.3           | 3.4             | 40.5            |
|                                                                 |             | Nagaraj 2020 (Open Fetal Surgery)[45]                       | 19 / 47                   | 40.4           | 27.5            | 54.9            |
|                                                                 |             | Rethmann 2017 (Open Fetal Surgery)[42]                      | 12 / 27                   | 44.4           | 27.2            | 63.1            |
| <b>Cumulative Study Statistics</b>                              |             |                                                             | <b>80/326</b>             | <b>25.5</b>    | <b>17.4</b>     | <b>35.9</b>     |
| Characteristics                                                 |             |                                                             | Statistics for each study |                |                 |                 |
| Time Point                                                      | Abnormality | Study Name (Author, year, Type of Surgery)                  | Event/Total               | Event rate (%) | Lower Limit (%) | Upper Limit (%) |
| Fetus ≤26 weeks GA                                              | Heterotopia | Nasiadko 2014 (Open Fetal Surgery)[25]                      | 1 / 9                     | 11.1           | 1.5             | 50.0            |
|                                                                 |             | Rethmann 2017 (Open Fetal Surgery)[42]                      | 4 / 27                    | 14.8           | 5.7             | 33.5            |
|                                                                 |             | Simon 2000 (Open Fetal Surgery)[16]                         | 2 / 4                     | 50.0           | 12.3            | 87.7            |
| <b>Cumulative Study Statistics</b>                              |             |                                                             | <b>7/40</b>               | <b>19.8</b>    | <b>7.7</b>      | <b>42.2</b>     |
| Characteristics                                                 |             |                                                             | Statistics for each study |                |                 |                 |
| Time Point                                                      | Abnormality | Study Name (Author, year, Type of Surgery)                  | Event/Total               | Event rate (%) | Lower Limit (%) | Upper Limit (%) |
| Fetus>26 weeks GA                                               | Heterotopia | Nasiadko 2014 (Open Fetal Surgery)[25]                      | 3 / 9                     | 33.3           | 11.1            | 66.7            |
|                                                                 |             | Rethmann 2017 (Open Fetal Surgery)[42]                      | 6 / 27                    | 22.2           | 10.3            | 41.4            |
| <b>Cumulative Study Statistics</b>                              |             |                                                             | <b>9/36</b>               | <b>25.3</b>    | <b>13.7</b>     | <b>41.9</b>     |
| Characteristics                                                 |             |                                                             | Statistics for each study |                |                 |                 |
| Time Point                                                      | Abnormality | Study Name (Author, year, Type of Surgery)                  | Event/Total               | Event rate (%) | Lower Limit (%) | Upper Limit (%) |
| Neonatal ≤ 28 days                                              | Heterotopia | Hino-Shishijura 2015 (Postnatal Surgery)[37]                | 20 / 66                   | 30.3           | 20.5            | 42.4            |
|                                                                 |             | Nagaraj 2016 (Open Fetal Surgery and Postnatal Surgery)[66] | 11 / 95                   | 11.6           | 6.5             | 19.7            |
|                                                                 |             | Nagaraj 2020 (Fetoscopic Fetal Surgery)[45]                 | 2 / 15                    | 13.3           | 3.4             | 40.5            |
|                                                                 |             | Nagaraj 2020 (Open Fetal Surgery)[45]                       | 19 / 47                   | 40.4           | 27.5            | 54.9            |
|                                                                 |             | Rethmann 2017 (Open Fetal Surgery)[42]                      | 12 / 27                   | 44.4           | 27.2            | 63.1            |

| Cumulative Study Statistics        |                      |                                                             | 64/250                    | 26.9           | 15.3            | 42.8            |
|------------------------------------|----------------------|-------------------------------------------------------------|---------------------------|----------------|-----------------|-----------------|
| Characteristics                    |                      |                                                             | Statistics for each study |                |                 |                 |
| Time Point                         | Abnormality          | Study Name (Author, year, Type of Surgery)                  | Event/Total               | Event rate (%) | Lower Limit (%) | Upper Limit (%) |
| All gestations                     | Hindbrain Herniation | Appasamy 2006 (Postnatal Surgery)[58]                       | 6 / 8                     | 75.0           | 37.7            | 93.7            |
|                                    |                      | Batty 2012 (Postnatal Surgery)[35]                          | 50 / 65                   | 76.9           | 65.2            | 85.6            |
|                                    |                      | Bekiesinska-Figatowska 2013 (Open Fetal Surgery)[63]        | 18 / 18                   | 97.4           | 69.0            | 99.8            |
|                                    |                      | Grant 2011 (Open Fetal Surgery)[36]                         | 29 / 29                   | 98.3           | 78.3            | 99.9            |
|                                    |                      | Mangels 2000 (Open Fetal Surgery)[17]                       | 37 / 37                   | 98.7           | 82.2            | 99.9            |
|                                    |                      | Mehollin-Ray 2014 (Open Fetal Surgery)[44]                  | 11 / 12                   | 91.7           | 58.7            | 98.8            |
|                                    |                      | Nagaraj 2016 (Open Fetal Surgery and Postnatal Surgery)[66] | 87 / 95                   | 91.6           | 84.1            | 95.7            |
|                                    |                      | Nagaraj 2016 (Postnatal Surgery)[52]                        | 86 / 90                   | 95.6           | 88.8            | 98.3            |
|                                    |                      | Warner 2019 (Postnatal Surgery)[8]                          | 20 / 20                   | 97.6           | 71.3            | 99.9            |
| <b>Cumulative Study Statistics</b> |                      |                                                             | <b>344/374</b>            | <b>92.2</b>    | <b>84.4</b>     | <b>96.3</b>     |
| Characteristics                    |                      |                                                             | Statistics for each study |                |                 |                 |
| Time Point                         | Abnormality          | Study Name (Author, year, Type of Surgery)                  | Event/Total               | Event rate (%) | Lower Limit (%) | Upper Limit (%) |
| Fetus <26 weeks GA                 | Hindbrain Herniation | Aertsen 2019 (Open Fetal Surgery)[6]                        | 23 / 23                   | 97.9           | 74.1            | 99.9            |
|                                    |                      | Aertsen 2019 (Postnatal Surgery)[6]                         | 29 / 29                   | 98.3           | 78.3            | 99.9            |
|                                    |                      | Calle 2020 (Open Fetal Surgery)[3]                          | 29 / 29                   | 98.3           | 78.3            | 99.9            |
|                                    |                      | Nagaraj 2020 (Fetoscopic Fetal Surgery)[45]                 | 15 / 15                   | 96.9           | 65.0            | 99.8            |
|                                    |                      | Nagaraj 2020 (Open Fetal Surgery)[45]                       | 47 / 47                   | 99.0           | 85.4            | 99.9            |
|                                    |                      | Simon 2000 (Open Fetal Surgery)[16]                         | 4 / 4                     | 90.0           | 32.6            | 99.4            |
|                                    |                      | Yu 2018 (Postnatal Surgery)[27]                             | 10 / 10                   | 95.5           | 55.2            | 99.7            |
| <b>Cumulative Study Statistics</b> |                      |                                                             | <b>157/157</b>            | <b>97.4</b>    | <b>92.8</b>     | <b>99.1</b>     |
| Characteristics                    |                      |                                                             | Statistics for each study |                |                 |                 |
| Time Point                         | Abnormality          | Study Name (Author, year, Type of Surgery)                  | Event/Total               | Event rate (%) | Lower Limit (%) | Upper Limit (%) |
| Fetus >26 weeks GA                 | Hindbrain Herniation | Abele 2013 (Postnatal Surgery)[57]                          | 37 / 37                   | 98.7           | 82.2            | 99.9            |
|                                    |                      | Carrabba 2019 (Fetoscopic Fetal Surgery)[65]                | 5 / 5                     | 91.7           | 37.8            | 99.5            |
|                                    |                      | Hashiguchi 2015 (Postnatal Surgery)[19]                     | 7 / 16                    | 43.8           | 22.5            | 67.6            |
|                                    |                      | Rangasami 2012 (Postnatal Surgery)[61]                      | 15 / 15                   | 96.9           | 65.0            | 99.8            |
| <b>Cumulative Study Statistics</b> |                      |                                                             | <b>64/73</b>              | <b>90.6</b>    | <b>43.7</b>     | <b>99.2</b>     |

| Characteristics             |                                |                                                             | Statistics for each study |                |                 |                 |
|-----------------------------|--------------------------------|-------------------------------------------------------------|---------------------------|----------------|-----------------|-----------------|
| Time Point                  | Abnormality                    | Study Name (Author, year, Type of Surgery)                  | Event/Total               | Event rate (%) | Lower Limit (%) | Upper Limit (%) |
| Neonatal ≤ 28 days          | Hindbrain Herniation           | Hino-Shishijura 2015 (Postnatal Surgery)[37]                | 66 / 66                   | 99.3           | 89.2            | 100.0           |
|                             |                                | Sival 2011 (Postnatal Surgery)[62]                          | 40 / 40                   | 98.8           | 83.3            | 99.9            |
|                             |                                | Sweeny 2012 (Postnatal Surgery)[54]                         | 33 / 33                   | 98.5           | 80.4            | 99.9            |
| Cumulative Study Statistics |                                |                                                             | <b>139/139</b>            | <b>98.9</b>    | <b>94.7</b>     | <b>99.8</b>     |
| Characteristics             |                                |                                                             | Statistics for each study |                |                 |                 |
| Time Point                  | Abnormality                    | Study Name (Author, year, Type of Surgery)                  | Event/Total               | Event rate (%) | Lower Limit (%) | Upper Limit (%) |
| All gestations              | Ventriculomegaly/Hydrocephalus | Appasamy 2006 (Postnatal Surgery)[58]                       | 5 / 8                     | 62.5           | 28.5            | 87.5            |
|                             |                                | Grant 2011 (Postnatal Surgery)[36]                          | 24 / 24                   | 98.0           | 74.9            | 99.9            |
|                             |                                | Hashiguchi 2015 (Postnatal Surgery)[19]                     | 16 / 16                   | 97.1           | 66.4            | 99.8            |
|                             |                                | Mangels 2000 (Open Fetal Surgery)[17]                       | 37 / 37                   | 98.7           | 82.2            | 99.9            |
|                             |                                | Mehollin-Ray 2014 (Open Fetal Surgery)[44]                  | 12 / 12                   | 96.2           | 59.7            | 99.8            |
|                             |                                | Nagaraj 2016 (Open Fetal Surgery and Postnatal Surgery)[66] | 75 / 95                   | 78.9           | 69.6            | 86.0            |
|                             |                                | Nagaraj 2016 (Postnatal Surgery)[52]                        | 77 / 90                   | 85.6           | 76.7            | 91.4            |
|                             |                                | Vaikousi 2017 (Postnatal Surgery)[26]                       | 11 / 11                   | 95.8           | 57.5            | 99.7            |
| Cumulative Study Statistics |                                |                                                             | <b>257/293</b>            | <b>87.6</b>    | <b>77.6</b>     | <b>93.5</b>     |
| Characteristics             |                                |                                                             | Statistics for each study |                |                 |                 |
| Time Point                  | Abnormality                    | Study Name (Author, year, Type of Surgery)                  | Event/Total               | Event rate (%) | Lower Limit (%) | Upper Limit (%) |
| Fetus ≤26 weeks GA          | Ventriculomegaly/Hydrocephalus | Batty 2012 (Postnatal Surgery)[35]                          | 48 / 48                   | 99.0           | 85.7            | 99.9            |
|                             |                                | Nasiadko 2014 (Open Fetal Surgery)[25]                      | 9 / 9                     | 95.0           | 52.5            | 99.7            |
|                             |                                | Rethmann 2017 (Open Fetal Surgery)[42]                      | 27 / 27                   | 98.2           | 77.0            | 99.9            |
|                             |                                | Rickard 2006 (Postnatal Surgery)[53]                        | 14 / 17                   | 82.4           | 57.3            | 94.2            |
|                             |                                | Sanz-Cortes 2018 (Fetoscopic Fetal Surgery)[28]             | 10 / 10                   | 95.5           | 55.2            | 99.7            |
|                             |                                | Sanz-Cortes 2018 (Open Fetal Surgery)[28]                   | 10 / 10                   | 95.5           | 55.2            | 99.7            |
|                             |                                | Sanz-Cortes 2020 (Fetoscopic Fetal Surgery)[48]             | 14 / 14                   | 96.7           | 63.4            | 99.8            |
|                             |                                | Sanz-Cortes 2020 (Open Fetal Surgery)[48]                   | 16 / 16                   | 97.1           | 66.4            | 99.8            |
|                             |                                | Shrot 2006 (Postnatal Surgery)[49]                          | 16 / 26                   | 61.5           | 42.1            | 77.9            |
|                             |                                | Yu 2018 (Postnatal Surgery)[27]                             | 10 / 10                   | 95.5           | 55.2            | 99.7            |
| Cumulative Study Statistics |                                |                                                             | <b>174/196</b>            | <b>93.2</b>    | <b>82.5</b>     | <b>97.5</b>     |
| Characteristics             |                                |                                                             | Statistics for each study |                |                 |                 |

| <b>Time Point</b>                  | <b>Abnormality</b>             | <b>Study Name (Author, year, Type of Surgery)</b> | <b>Event/Total</b>               | <b>Event rate (%)</b> | <b>Lower Limit (%)</b> | <b>Upper Limit (%)</b> |
|------------------------------------|--------------------------------|---------------------------------------------------|----------------------------------|-----------------------|------------------------|------------------------|
| Fetus>26 weeks GA                  | Ventriculomegaly/Hydrocephalus | Batty 2012 (Postnatal Surgery)[35]                | 17 / 17                          | 97.2                  | 67.8                   | 99.8                   |
|                                    |                                | Rangasami 2012 (Postnatal Surgery)[61]            | 13 / 15                          | 86.7                  | 59.5                   | 96.6                   |
|                                    |                                | Warner 2019 (Postnatal Surgery)[8]                | 20 / 20                          | 97.6                  | 71.3                   | 99.9                   |
| <b>Cumulative Study Statistics</b> |                                |                                                   | <b>50/52</b>                     | <b>92.5</b>           | <b>78.8</b>            | <b>97.6</b>            |
| <b>Characteristics</b>             |                                |                                                   | <b>Statistics for each study</b> |                       |                        |                        |
| <b>Time Point</b>                  | <b>Abnormality</b>             | <b>Study Name (Author, year, Type of Surgery)</b> | <b>Event/Total</b>               | <b>Event rate (%)</b> | <b>Lower Limit (%)</b> | <b>Upper Limit (%)</b> |
| Neonatal ≤ 28 days                 | Ventriculomegaly/Hydrocephalus | Danzer 2007 (Open Fetal Surgery)[40]              | 22 / 22                          | 97.8                  | 73.2                   | 99.9                   |
|                                    |                                | Danzer 2007 (Postnatal Surgery)[40]               | 16 / 16                          | 97.1                  | 66.4                   | 99.8                   |
|                                    |                                | Sival 2011 (Postnatal Surgery)[62]                | 38 / 40                          | 95.0                  | 82.1                   | 98.7                   |
|                                    |                                | Sweeny 2012 (Postnatal Surgery)[54]               | 33 / 33                          | 98.5                  | 80.4                   | 99.9                   |
| <b>Cumulative Study Statistics</b> |                                |                                                   | <b>109/111</b>                   | <b>96.6</b>           | <b>90.6</b>            | <b>98.8</b>            |

Table 5: Meta-Analysis for all MRI studies.

†a Meta-Analysis not possible as reported by a single study.

| <b>Characteristics</b>                                          |                                       |                                                        | <b>Statistics for each study</b> |                       |                        |                        |
|-----------------------------------------------------------------|---------------------------------------|--------------------------------------------------------|----------------------------------|-----------------------|------------------------|------------------------|
| <b>Time Point</b>                                               | <b>Abnormality</b>                    | <b>Study Name (Author, year, Type of Surgery)</b>      | <b>Event/Total</b>               | <b>Event rate (%)</b> | <b>Lower Limit (%)</b> | <b>Upper Limit (%)</b> |
| <b>Fetus &gt;26 weeks GA, Neonatal ≤28 days, All gestations</b> | Chiari II reversal (Complete/Partial) | Mehollin-Ray 2014 (Open Fetal Surgery)[44]             | 11 / 12                          | 91.7                  | 58.7                   | 98.8                   |
|                                                                 |                                       | Nasiadko 2014 (Open Fetal Surgery)[25]                 | 9 / 9                            | 95.0                  | 52.5                   | 99.7                   |
|                                                                 |                                       | Rethmann 2017 (Open Fetal Surgery)[42]                 | 25 / 27                          | 92.6                  | 74.8                   | 98.1                   |
|                                                                 |                                       | Carrabba 2019 (Fetoscopic Fetal Surgery)[65]           | 3 / 5                            | 60.0                  | 20.0                   | 90.0                   |
|                                                                 |                                       | Nagaraj 2020 (Open Fetal Surgery)[45]                  | 47 / 47                          | 99.0                  | 85.4                   | 99.9                   |
|                                                                 |                                       | Nagaraj 2020 (Fetoscopic Fetal Surgery)[45]            | 15 / 15                          | 96.9                  | 65.0                   | 99.8                   |
|                                                                 |                                       | Zarutskie 2019 (Open and Fetoscopic Fetal Surgery)[51] | 32 / 48                          | 66.7                  | 52.3                   | 78.5                   |
|                                                                 |                                       | Grant 2011 (Open Fetal Surgery)[36]                    | 29 / 29                          | 98.3                  | 78.3                   | 99.9                   |
|                                                                 |                                       | Nagaraj 2017 (Open Fetal Surgery)[39]                  | 26 / 32                          | 81.3                  | 64.1                   | 91.3                   |
|                                                                 |                                       | Nagaraj 2017 (Postnatal Surgery)[39]                   | 19 / 74                          | 25.7                  | 17.0                   | 36.8                   |



| Cumulative Study Statistics |                                       |                                                        | 216/298                   | 85.9           | 66.3            | 94.9            |
|-----------------------------|---------------------------------------|--------------------------------------------------------|---------------------------|----------------|-----------------|-----------------|
| Characteristics             |                                       |                                                        | Statistics for each study |                |                 |                 |
| Time Point                  | Abnormality                           | Study Name (Author, year, Type of Surgery)             | Event/Total               | Event rate (%) | Lower Limit (%) | Upper Limit (%) |
| Fetus > 26 weeks GA         | Chiari II reversal (Complete/Partial) | Carrabba 2019 (Fetoscopic Fetal Surgery)[65]           | 3 / 5                     | 60.0           | 20.0            | 90.0            |
|                             |                                       | Mehollin-Ray 2014 (Open Fetal Surgery)[44]             | 11 / 12                   | 91.7           | 58.7            | 98.8            |
|                             |                                       | Nasiadko 2014 (Open Fetal Surgery)[25]                 | 9 / 9                     | 95.0           | 52.5            | 99.7            |
|                             |                                       | Rethmann 2017 (Open Fetal Surgery)[42]                 | 25 / 27                   | 92.6           | 74.8            | 98.1            |
| Cumulative Study Statistics |                                       |                                                        | 48/50                     | 87.7           | 69.9            | 95.7            |
| Characteristics             |                                       |                                                        | Statistics for each study |                |                 |                 |
| Time Point                  | Abnormality                           | Study Name (Author, year, Type of Surgery)             | Event/Total               | Event rate (%) | Lower Limit (%) | Upper Limit (%) |
| Neonatal ≤ 28 days          | Chiari II reversal (Complete/Partial) | Carrabba 2019 (Fetoscopic Fetal Surgery)[65]           | 5 / 5                     | 91.7           | 37.8            | 99.5            |
|                             |                                       | Nagaraj 2020 (Fetoscopic Fetal Surgery)[45]            | 15 / 15                   | 96.9           | 65.0            | 99.8            |
|                             |                                       | Nagaraj 2020 (Open Fetal Surgery)[45]                  | 47 / 47                   | 99.0           | 85.4            | 99.9            |
|                             |                                       | Zarutskie 2019 (Open and Fetoscopic Fetal Surgery)[51] | 32 / 48                   | 66.7           | 52.3            | 78.5            |
| Cumulative Study Statistics |                                       |                                                        | 99/115                    | 92.3           | 60.7            | 99.0            |
| Characteristics             |                                       |                                                        | Statistics for each study |                |                 |                 |
| Time Point                  | Abnormality                           | Study Name (Author, year, Type of Surgery)             | Event/Total               | Event rate (%) | Lower Limit (%) | Upper Limit (%) |
| All gestations              | Chiari II reversal (Complete/Partial) | Grant 2011 (Open Fetal Surgery)[36]                    | 29 / 29                   | 98.3           | 78.3            | 99.9            |
|                             |                                       | Nagaraj 2017 (Open Fetal Surgery)[39]                  | 26 / 32                   | 81.3           | 64.1            | 91.3            |
|                             |                                       | Nagaraj 2017 (Postnatal Surgery)[39]                   | 19 / 74                   | 25.7           | 17.0            | 36.8            |
| Cumulative Study Statistics |                                       |                                                        | 74/135                    | 76.2           | 22.7            | 97.2            |
| Characteristics             |                                       |                                                        | Statistics for each study |                |                 |                 |

| Time Point                            | Abnormality                                 | Study Name (Author, year, Type of Surgery)             | Event/Total                      | Event rate (%) | Lower Limit (%) | Upper Limit (%) |
|---------------------------------------|---------------------------------------------|--------------------------------------------------------|----------------------------------|----------------|-----------------|-----------------|
| Fetus >26 weeks GA                    | Stable Ventriculomegaly Post Operatively    | Nasiadko 2014 (Open Fetal Surgery)[25]                 | 1 / 9                            | 11.1           | 1.5             | 50.0            |
| <b>Cumulative Study Statistics †a</b> |                                             |                                                        | <b>1 / 9</b>                     | <b>11.1</b>    | <b>1.5</b>      | <b>50.0</b>     |
| <b>Characteristics</b>                |                                             |                                                        | <b>Statistics for each study</b> |                |                 |                 |
| Time Point                            | Abnormality                                 | Study Name (Author, year, Type of Surgery)             | Event/Total                      | Event rate (%) | Lower Limit (%) | Upper Limit (%) |
| Fetus > 26 weeks GA                   | Reduced Ventriculomegaly Post Operatively   | Nasiadko 2014 (Open Fetal Surgery)[25]                 | 1 / 9                            | 11.1           | 1.5             | 50.0            |
|                                       |                                             | Rethmann 2017 (Open Fetal Surgery)[42]                 | 1 / 27                           | 3.7            | 0.5             | 22.1            |
| <b>Cumulative Study Statistics</b>    |                                             |                                                        | <b>2/36</b>                      | <b>6.3</b>     | <b>1.6</b>      | <b>22.2</b>     |
| <b>Characteristics</b>                |                                             |                                                        | <b>Statistics for each study</b> |                |                 |                 |
| Time Point                            | Abnormality                                 | Study Name (Author, year, Type of Surgery)             | Event/Total                      | Event rate (%) | Lower Limit (%) | Upper Limit (%) |
| Fetus >26 weeks GA, Neonatal ≤28 days | Increased Ventriculomegaly Post Operatively | Mehollin-Ray 2014 (Open Fetal Surgery)[44]             | 12 / 12                          | 96.2           | 59.7            | 99.8            |
|                                       |                                             | Nagaraj 2020 (Fetoscopic Fetal Surgery)[45]            | 6 / 6                            | 92.9           | 42.3            | 99.6            |
|                                       |                                             | Nagaraj 2020 (Open Fetal Surgery)[45]                  | 3 / 5                            | 60.0           | 20.0            | 90.0            |
|                                       |                                             | Nasiadko 2014 (Open Fetal Surgery)[25]                 | 7 / 9                            | 77.8           | 42.1            | 94.4            |
|                                       |                                             | Rethmann 2017 (Open Fetal Surgery)[42]                 | 20 / 27                          | 74.1           | 54.7            | 87.1            |
|                                       |                                             | Zarutskie 2019 (Open and Fetoscopic Fetal Surgery)[51] | 16 / 48                          | 33.3           | 21.5            | 47.7            |
| <b>Cumulative Study Statistics</b>    |                                             |                                                        | <b>64/107</b>                    | <b>71.7</b>    | <b>44.6</b>     | <b>88.8</b>     |
| <b>Characteristics</b>                |                                             |                                                        | <b>Statistics for each study</b> |                |                 |                 |
| Time Point                            | Abnormality                                 | Study Name (Author, year, Type of Surgery)             | Event/Total                      | Event rate (%) | Lower Limit (%) | Upper Limit (%) |
| Fetus >26 weeks GA                    | Increased Ventriculomegaly Post Operatively | Mehollin-Ray 2014 (Open Fetal Surgery)[44]             | 12 / 12                          | 96.2           | 59.7            | 99.8            |
|                                       |                                             | Nagaraj 2020 (Fetoscopic Fetal Surgery)[45]            | 6 / 6                            | 92.9           | 42.3            | 99.6            |
|                                       |                                             | Nagaraj 2020 (Open Fetal Surgery)[45]                  | 3 / 5                            | 60.0           | 20.0            | 90.0            |

|                                    |                                             |                                                        |                                  |                       |                        |                        |
|------------------------------------|---------------------------------------------|--------------------------------------------------------|----------------------------------|-----------------------|------------------------|------------------------|
|                                    |                                             | Nasiadko 2014 (Open Fetal Surgery)[25]                 | 7 / 9                            | 77.8                  | 42.1                   | 94.4                   |
|                                    |                                             | Rethmann 2017 (Open Fetal Surgery)[42]                 | 20 / 27                          | 74.1                  | 54.7                   | 87.1                   |
| <b>Cumulative Study Statistics</b> |                                             |                                                        | <b>48/59</b>                     | <b>76.8</b>           | <b>63.1</b>            | <b>86.4</b>            |
| <b>Characteristics</b>             |                                             |                                                        | <b>Statistics for each study</b> |                       |                        |                        |
| <b>Time Point</b>                  | <b>Abnormality</b>                          | <b>Study Name (Author, year, Type of Surgery)</b>      | <b>Event/Total</b>               | <b>Event rate (%)</b> | <b>Lower Limit (%)</b> | <b>Upper Limit (%)</b> |
| <b>Neonatal ≤28 days</b>           | Increased Ventriculomegaly Post Operatively | Rethmann 2017 (Open Fetal Surgery)[42]                 | 15 / 27                          | 55.6                  | 36.9                   | 72.8                   |
|                                    |                                             | Zarutskie 2019 (Open and Fetoscopic Fetal Surgery)[51] | 16 / 48                          | 33.3                  | 21.5                   | 47.7                   |
| <b>Cumulative Study Statistics</b> |                                             |                                                        | <b>31/75</b>                     | <b>43.4</b>           | <b>23.8</b>            | <b>65.3</b>            |

Table 6: Meta-Analysis for Intracranial Post-operative findings

†a Meta-Analysis not possible as reported by a single study

| <b>Reported Abnormality</b>   | <b>First Author, Year of Publication and timing of MMC surgery</b> | <b>Description n/N (%) or p value</b>                                                                                                                                                                                                                                                                                                                            |
|-------------------------------|--------------------------------------------------------------------|------------------------------------------------------------------------------------------------------------------------------------------------------------------------------------------------------------------------------------------------------------------------------------------------------------------------------------------------------------------|
| Posterior Fossae Measurements | Woitek 2014 (Postnatal Surgery)[33]                                | <ul style="list-style-type: none"> <li>Clivus supra-occiput angle (CSA) and transverse diameter of the posterior fossae (TDPF) of MMC was significantly smaller than controls (<math>p \leq 0.001</math>)</li> <li>TDPF in closed spina bifida was significantly smaller in closed spina bifida patients than in controls (<math>p \leq 0.001</math>)</li> </ul> |
|                               | Aertsen 2019 (Postnatal and Fetal Surgery)[6]                      | <ul style="list-style-type: none"> <li>CSO, TDPF, Transverse cerebellar diameter (TCD), and posterior fossae area (PFA) was significantly different between MMC (who were operated on postnatally), and MMC (who had open Fetal surgery) versus controls (<math>p \leq 0.0001</math>)</li> </ul>                                                                 |
|                               | Batty 2012 (Postnatal Surgery)[35]                                 | <ul style="list-style-type: none"> <li>PFA was reduced in MMC patients</li> </ul>                                                                                                                                                                                                                                                                                |
|                               | Warner 2019 (Postnatal Surgery)[8]                                 | <ul style="list-style-type: none"> <li>Bony PFA was smaller in MMC patients, at 20-24 weeks (<math>p \leq 0.001</math>), and 30-32 weeks (<math>p \leq 0.001</math>)</li> </ul>                                                                                                                                                                                  |

|                                                          |                                              |                                                                                                                                                                                                                                                                                                                                                                                                                                                                                                                                                                |
|----------------------------------------------------------|----------------------------------------------|----------------------------------------------------------------------------------------------------------------------------------------------------------------------------------------------------------------------------------------------------------------------------------------------------------------------------------------------------------------------------------------------------------------------------------------------------------------------------------------------------------------------------------------------------------------|
|                                                          |                                              |                                                                                                                                                                                                                                                                                                                                                                                                                                                                                                                                                                |
|                                                          | Grant 2011 (Postnatal Surgery)[36]           | <ul style="list-style-type: none"> <li>• CSA was acute in MMC patients but was comparable to controls at birth 24/70 (34.3%)</li> </ul>                                                                                                                                                                                                                                                                                                                                                                                                                        |
| Anatomical Descriptive markers of Chiari II malformation | Hino-Shishikura 2015 (Postnatal Surgery)[37] | <ul style="list-style-type: none"> <li>• Lower level of medullary kink and low pontomesencephalic junction in MMC patients with cortical malformations 20/66 (30.3%)</li> </ul>                                                                                                                                                                                                                                                                                                                                                                                |
|                                                          | Calle 2020 (Fetal Open Surgery)[3]           | <ul style="list-style-type: none"> <li>• Downward herniation of the cerebellum 29/29 (100%)</li> <li>• Towering cerebellum 6/29 (20.7%)</li> <li>• Intermediate towering of the cerebellum 9/29 (31%)</li> <li>• Downward herniation of the brainstem 18/29 (62.1%)</li> <li>• Intermediate herniation of the brainstem 9/29 (31%)</li> <li>• Flattening or deformity of the fourth ventricle 28/29 (96.6%)</li> <li>• Tectal beaking 7/29 (24.1%)</li> <li>• Intermediate tectal beaking 20/29 (69%)</li> <li>• Hypoplastic tentorium 29/29 (100%)</li> </ul> |

Table 7: Additional infratentorial intracranial findings using traditional MRI sequences.

| Reported Abnormality    | First Author, Year of Publication and timing of MMC surgery | Description n/N (%) or p value                                                                                                                                         |
|-------------------------|-------------------------------------------------------------|------------------------------------------------------------------------------------------------------------------------------------------------------------------------|
| Ventricular Abnormality | Rickard 2006 (Postnatal Surgery)[53]                        | <ul style="list-style-type: none"> <li>• Angular appearance of ventricle 5/17 (29%)</li> </ul>                                                                         |
|                         | Sweeny 2012 (Postnatal Surgery)[54]                         | <ul style="list-style-type: none"> <li>• Triventricular hydrocephalus 19/33 (57.6%)</li> <li>• Lateral ventricular dilatation or colpocephaly 14/33 (42.4%)</li> </ul> |
|                         | Nagaraj 2017 (Postnatal Surgery)[39]                        | <ul style="list-style-type: none"> <li>• Lateral and third ventricle increased 70/74 (94.6%)</li> </ul>                                                                |
|                         | Danzer 2007 (Postnatal Surgery and Fetal Open Surgery)[40]  | <ul style="list-style-type: none"> <li>• Antero-Posterior (AP) diameter of the fourth ventricle of MMC patients (who were operated on</li> </ul>                       |

|                                                                  |                                                            |                                                                                                                                                                                                                                                          |
|------------------------------------------------------------------|------------------------------------------------------------|----------------------------------------------------------------------------------------------------------------------------------------------------------------------------------------------------------------------------------------------------------|
|                                                                  |                                                            | postnatally and prenatally) is significantly smaller than controls $p \leq 0.001$                                                                                                                                                                        |
| Cortical Abnormalities                                           | Sival 2011 (Postnatal Surgery)[62]                         | <ul style="list-style-type: none"> <li>Diffuse white matter oedema 33/40 (82.5%)</li> <li>Grey matter oedema 30/40 (75%)</li> </ul>                                                                                                                      |
|                                                                  | Danzer 2007 (Postnatal Surgery and Fetal Open Surgery)[40] | <ul style="list-style-type: none"> <li>Brain thickness reduced pre and postnatally in MMC patients having postnatal surgery, and MMC patients having Fetal open surgery <math>p \leq 0.0001</math></li> </ul>                                            |
|                                                                  | Rethman 2017 (Fetal Open Surgery)[42]                      | <ul style="list-style-type: none"> <li>Polymicrogyria 1/27 (3.7%)</li> </ul>                                                                                                                                                                             |
| Subarachnoid Spaces and Cerebro-Spinal Fluid (CSF) Abnormalities | Danzer 2007 (Postnatal Surgery)[40]                        | <ul style="list-style-type: none"> <li>The CSF space at the level of the cerebellar width (<math>p \leq 0.0001</math>) and AP diameter of cerebellum (<math>p \leq 0.001</math>) was reduced prenatally and postnatally in MMC</li> </ul>                |
|                                                                  | Rethman 2017 (Fetal Open Surgery)[42]                      | <ul style="list-style-type: none"> <li>The total subarachnoid space at the level of the temporal horns was smaller in MMC and myeloschisis (MS) patients 27/27 (100%)</li> <li>Supratentorial spaces were smaller in MS patients 9/27 (33.3%)</li> </ul> |
|                                                                  | Danzer 2007 (Fetal Open Surgery)[40]                       | <ul style="list-style-type: none"> <li>No supratentorial CSF in the subarachnoid space was seen prior to surgery 22/22 (100%)</li> </ul>                                                                                                                 |
|                                                                  | Nagaraj 2017 (Postnatal and Fetal Open Surgery)[39]        | <ul style="list-style-type: none"> <li>Effacement of extra-axial CSF in all MMC patients prenatally was 94/102 (92.1%) in the antenatal period, and 23/102 (22.5%) in the postnatal period</li> </ul>                                                    |

Table 8: Additional supratentorial intracranial findings using traditional MRI sequences

| Reported Abnormality                | First Author, Year of Publication and timing of MMC surgery | Description n/N (%) or p value                                                                                                                                                                                  |
|-------------------------------------|-------------------------------------------------------------|-----------------------------------------------------------------------------------------------------------------------------------------------------------------------------------------------------------------|
| Intracranial Haemorrhages and cysts | Mangels 2000 (Fetal Open Surgery)[17]                       | <ul style="list-style-type: none"> <li>Periventricular Leukomalacia 3/4 (75%)</li> <li>Subependymal haemorrhage 1/4 (25%)</li> <li>Subdural haematoma 1/4 (25%)</li> <li>Lobar haemorrhage 1/4 (25%)</li> </ul> |
| Signal Intensity Ratio Changes      | Rangasami 2012 (Postnatal Surgery)[61]                      | <ul style="list-style-type: none"> <li>Signal intensity ratio is higher in the cerebellar vermis and periventricular region of MMC patients 15/15 (100%)</li> </ul>                                             |

Table 9: Miscellaneous intracranial findings using traditional MRI sequences

| <b>Reported Feature</b>                                         | <b>First Author, Year of Publication and timing of MMC surgery</b> | <b>Description n/N (%) or p value</b>                                                                                                                                                                                                                                                                                                                                                                                    |
|-----------------------------------------------------------------|--------------------------------------------------------------------|--------------------------------------------------------------------------------------------------------------------------------------------------------------------------------------------------------------------------------------------------------------------------------------------------------------------------------------------------------------------------------------------------------------------------|
| Posterior Fossae Measurements                                   | Aertsen 2019 (Postnatal and Fetal Open surgery)[6]                 | <ul style="list-style-type: none"> <li>In MMC patients who had Fetal open surgery TCD, CSO, TDPF, PFA showed significant differences within 1 week of prenatal surgery (<math>p</math> 0.01 to <math>\leq</math> 0.001), most evident of which is cerebellar herniation level (CHL), and CSO angle (<math>p \leq</math> 0.0001)</li> </ul>                                                                               |
|                                                                 | Rethmann 2017 (Fetal Open surgery)[42]                             | <ul style="list-style-type: none"> <li>CSO angle increased significantly between pre and post-operative MRI 27/27 (100%)</li> <li>The cerebral bony BPD increased significantly at postoperative MRI 27/27 (100%)</li> <li>Posterior fossae volume (PFV), PFA, and TDPF were still smaller in MMC than in controls after surgery 27/27 (100%)</li> </ul>                                                                 |
|                                                                 | Grant 2011 (Postnatal and Fetal Open surgery)[36]                  | <ul style="list-style-type: none"> <li>CSO angle starts off as acute (<math>p \leq</math> 0.001) but becomes similar to controls after birth in all MMC patients. Antenatal repair had little effect.</li> <li>At birth the posterior fossae size for MMC patients with postnatal repair was reduced more than MMC patients who had antenatal repair and controls <math>p=0.015</math></li> </ul>                        |
|                                                                 | Nagaraj 2020 (Fetal Open and Fetoscopic Surgery)[45]               | <ul style="list-style-type: none"> <li>Improvement in posterior fossae crowding was seen in MMC patients after open Fetal surgery 5/5 (100%), and fetoscopic surgery 6/6 (100%)</li> </ul>                                                                                                                                                                                                                               |
| <b>Anatomical Descriptive Markers of Chiari II Malformation</b> | Rethmann 2017 (Fetal Open surgery)[42]                             | <ul style="list-style-type: none"> <li>Persistent herniation of the choroid plexus through the foramen magnum was seen in cases of reversed Chiari II 12/27 (44.4%)</li> <li>Flattening of the inferior pontine notch was present after birth with resolved hindbrain herniation 21/27 (77.8%)</li> <li>The tectal plate remained dysplastic in all neonates with resolved hindbrain herniation 25/27 (92.6%)</li> </ul> |
| <b>Subarachnoid space and CSF</b>                               | Mehollin-Ray 2014 (Fetal Open surgery)[44]                         | <ul style="list-style-type: none"> <li>MMC patients showed an increase in extra-axial space of 5.5 mm on average after surgery 10/12 (83.3%)</li> </ul>                                                                                                                                                                                                                                                                  |

|                                        |                                                      |                                                                                                                                                                                                                                                                                                                                                                                                                                                                                                                                            |
|----------------------------------------|------------------------------------------------------|--------------------------------------------------------------------------------------------------------------------------------------------------------------------------------------------------------------------------------------------------------------------------------------------------------------------------------------------------------------------------------------------------------------------------------------------------------------------------------------------------------------------------------------------|
|                                        | Rethmann 2017 (Fetal Open surgery)[42]               | <ul style="list-style-type: none"> <li>• Supratentorial total subarachnoid space widened postoperatively 22/25 (88%)</li> <li>• Post-operatively the total subarachnoid spaces increased more in myeloschisis than in MMC 9/27 (33.3%)</li> <li>• In all cases of resolved hindbrain herniation, total subarachnoid space decreased 1-3 mm width postnatally 25/25 100%</li> </ul>                                                                                                                                                         |
|                                        | Danzer 2007 (Postnatal and Fetal open surgery)[40]   | <ul style="list-style-type: none"> <li>• Subarachnoid space and supratentorial CSF remained reduced postnatally in MMC patients who had postnatal surgery <math>p \leq 0.0001</math></li> <li>• Subarachnoid space and supratentorial CSF improved in MMC patients who had prenatal surgery</li> <li>• In MMC patients who had prenatal surgery, the CSF space at the level of the cerebellar width (<math>p \leq 0.0001</math>) and AP diameter of the cerebellum (<math>p \leq 0.001</math>) reduced and improved postnatally</li> </ul> |
|                                        | Nagaraj 2020 (Fetal Open and Fetoscopic Surgery)[45] | <ul style="list-style-type: none"> <li>• Patency of extra-axial space was seen in MMC patients after open Fetal surgery 5/5 (100%), and fetoscopic surgery 6/6 (100%)</li> </ul>                                                                                                                                                                                                                                                                                                                                                           |
| <b>Ventricular system measurements</b> | Nasiadko 2014 (Fetal Open Surgery)[25]               | <ul style="list-style-type: none"> <li>• Resolved aqueductal stenosis post-surgery 7/9 (77.8%)</li> </ul>                                                                                                                                                                                                                                                                                                                                                                                                                                  |
|                                        | Rethmann 2017 (Fetal Open surgery)[42]               | <ul style="list-style-type: none"> <li>• Ventricular width index (VWI) increased in 2/27 (7.4%), and decreased in 12/27 (44.4%) antenatally</li> <li>• VWI increased in 3/27 (11.1%) and decreased in 10/27 (37%) in the neonatal period.</li> </ul>                                                                                                                                                                                                                                                                                       |
|                                        | Nagaraj 2017 (Postnatal and Fetal Open Surgery)[39]  | <ul style="list-style-type: none"> <li>• The prenatal lateral and third ventricle size was significantly smaller than the postnatal ventricular size in both the prenatal and postnatal repair groups <math>p \leq 0.001</math></li> </ul>                                                                                                                                                                                                                                                                                                 |

Table 10: Additional post-operative MRI features using traditional MRI sequences

| <b>Reported Abnormality</b> | <b>First Author, Year of Publication and timing of MMC surgery</b> | <b>Intracranial Location and Description n/N (%) or p value reported in individual studies</b> |
|-----------------------------|--------------------------------------------------------------------|------------------------------------------------------------------------------------------------|
|                             | Mignone Philpott 2013 (Postnatal Surgery)[47]                      | Infratentorial:                                                                                |

|                                                                   |                                                          |                                                                                                                                                                                                                                                                                                                                                                                                                                                                                                                            |
|-------------------------------------------------------------------|----------------------------------------------------------|----------------------------------------------------------------------------------------------------------------------------------------------------------------------------------------------------------------------------------------------------------------------------------------------------------------------------------------------------------------------------------------------------------------------------------------------------------------------------------------------------------------------------|
| Apparent Diffusion Co-efficient (ADC) value changes in MMC brains |                                                          | <ul style="list-style-type: none"> <li>• ADC values in MMC cerebella higher than in controls <math>p=0.0126</math></li> </ul>                                                                                                                                                                                                                                                                                                                                                                                              |
|                                                                   | Shrot 2006 (Postnatal Surgery)[49]                       | Supratentorial: <ul style="list-style-type: none"> <li>• ADC values lower in frontal (<math>p=0.01</math>) and temporal lobes (<math>p=0.05</math>) in MMC brains</li> </ul>                                                                                                                                                                                                                                                                                                                                               |
|                                                                   | Sanz-Cortes 2020 (Fetal Open and Fetoscopic Surgery)[48] | Supratentorial: <ul style="list-style-type: none"> <li>• ADC values were higher in the genu of the corpus callosum in MMC undergoing open Fetal surgery 16/30 (53.3%)</li> <li>• ADC values were higher in the genu of the corpus callosum in MMC undergoing fetoscopic Fetal surgery 14/27 (51.9%)</li> <li>• ADC values were higher in basal ganglia of MMC undergoing open Fetal surgery 16/30 (53.3%)</li> <li>• ADC values were higher in basal ganglia of MMC undergoing fetoscopic surgery 14/27 (51.9%)</li> </ul> |
| Fractional Anisotropy Changes                                     | Woitek 2016 (Postnatal Surgery)[50]                      | Fractional Anisotropy significantly higher in the midbrain of MMC patients $p=0.003$                                                                                                                                                                                                                                                                                                                                                                                                                                       |
| Abnormal high T2 signal                                           | Warner 2019 (Postnatal Surgery)[8]                       | Infratentorial: <ul style="list-style-type: none"> <li>• Abnormal high T2 signal in cerebellar vermis 10/20 (50%) at 20-22 weeks, and 11/20 (55%) at 30-32 weeks.</li> </ul>                                                                                                                                                                                                                                                                                                                                               |
| Ventricular Abnormalities                                         | Sival 2011 (Postnatal Surgery)[62]                       | Supratentorial: <ul style="list-style-type: none"> <li>• Aqueductal stenosis 38/40 (95%)</li> <li>• Occipital horn enlargement 40/40 (100%)</li> <li>• Temporal horn enlargement 22/40 (55%)</li> </ul>                                                                                                                                                                                                                                                                                                                    |
|                                                                   | Zarutskie 2019 (Fetal Open and Fetoscopic Surgery)[51]   | Supratentorial:                                                                                                                                                                                                                                                                                                                                                                                                                                                                                                            |



|                                                |                                                      |                                                                                                                                                                                                                                                                                                                                                                                                                           |
|------------------------------------------------|------------------------------------------------------|---------------------------------------------------------------------------------------------------------------------------------------------------------------------------------------------------------------------------------------------------------------------------------------------------------------------------------------------------------------------------------------------------------------------------|
|                                                |                                                      | <ul style="list-style-type: none"> <li>Increased ventricular volume and increased ventricular volume growth post open and fetoscopic Fetal surgery 16/48 (33.3%)</li> </ul>                                                                                                                                                                                                                                               |
| Intraventricular and Intracranial haemorrhages | Nagaraj 2020 (Fetal Open and Fetoscopic Surgery)[45] | <p>Miscellaneous:</p> <ul style="list-style-type: none"> <li>Intraventricular haemorrhage in MMC brain of open Fetal surgery 1/47 (2.1%)</li> <li>Intracranial haemorrhage in MMC brains of open Fetal surgery 10/47 (21.3%)</li> <li>Intraventricular haemorrhage in MMC brain of fetoscopic Fetal surgery 1/15 (6.7%)</li> <li>Intracranial haemorrhage in MMC brains of fetoscopic Fetal surgery 3/15 (20%)</li> </ul> |

Table 11: Additional intracranial findings using advanced MRI sequences
